# Supplementary material for: Whole-Genome Sequence of Multidrug-Resistant Methicillin-Resistant Staphylococcus epidermidis Carrying Biofilm-Associated Genes and a Unique Composite of SCCmec
Source: MDPI journal article supplement (doi:10.3390/antibiotics11070861), 2022-06-24
Supplement: s1 [file s1]

Table S1. Genomic characteristics of isolated organisms

| ID   | Isolation source               | Age    | Gender | PubMLST                           | Identity | ST    | Biosample    | Source                 | bp      | Contigs | GC    | CDS         | tRNA | rRNA | Coverage | N50    |
|------|--------------------------------|--------|--------|-----------------------------------|----------|-------|--------------|------------------------|---------|---------|-------|-------------|------|------|----------|--------|
| 9SE  | Urinary tract infection        | 25     | Male   | <i>Staphylococcus epidermidis</i> | 100%     | 2     | SAMN25227152 | Chronic UTI            | 2505680 | 45      | 32.11 | 2413        | 52   | 4    | 399      | 165065 |
| 14SP | Wound (chronic skin infection) | 13     | Female | <i>Staphylococcus epidermidis</i> | 100%     | Novel | SAMN25227155 | Chronic skin infection | 2522530 | 14      | 32.03 | <u>2422</u> | 52   | 3    | 370      | 133978 |
| 30SP | Blood (sepsis)                 | 5 Days | Female | <i>Staphylococcus epidermidis</i> | 100%     | 369   | SAMN25227162 | Sepsis                 | 2469456 | 28      | 31.94 | <u>2344</u> | 52   | 4    | 471      | 208563 |

Table S2. The virulence factors identified in the isolates

| Gene                                                  |                | RP62A    | 9SE      | 14SP     | 30SP     |
|-------------------------------------------------------|----------------|----------|----------|----------|----------|
| <b>Adherence (22)</b>                                 |                |          |          |          |          |
| Autolysin                                             | <i>atl</i>     | SERP0636 | orf01170 | orf00483 | orf01589 |
| Cell wall associated fibronectin binding protein      | <i>ebh</i>     | SERP1011 | orf00357 | orf00174 | orf00358 |
| Clumping factor A                                     | <i>clfA</i>    | -        | -        | -        | -        |
| Clumping factor B                                     | <i>clfB</i>    | -        | -        | -        | -        |
| Collagen adhesion                                     | <i>cna</i>     | -        | -        | -        | -        |
| Elastin binding protein                               | <i>ebp</i>     | SERP1048 | orf00394 | orf00211 | orf00321 |
| Extracellular adherence protein/MHC analogous protein | <i>eap/map</i> | -        | -        | -        | -        |

|                                          |             |           |          |          |          |
|------------------------------------------|-------------|-----------|----------|----------|----------|
| Fibrinogen binding protein               | <i>efb</i>  | -         | -        | -        | -        |
| Fibronectin binding proteins             | <i>fnbA</i> | -         | -        | -        | -        |
| Fibronectin binding proteins             | <i>fnbB</i> | -         | -        | -        | -        |
| Intercellular adhesin                    | <i>icaA</i> | SERP2293  | orf01027 | -        | -        |
| Intercellular adhesin                    | <i>icaB</i> | SERP2295  | orf01029 | -        | -        |
| Intercellular adhesin                    | <i>icaC</i> | SERP2296  | orf01030 | -        | -        |
| Intercellular adhesin                    | <i>icaD</i> | SERP2294  | orf01031 | -        | -        |
| Intercellular adhesin                    | <i>icaR</i> | SERP2292  | orf01026 | -        | -        |
| Ser-Asp rich fibrinogen-binding proteins | <i>sdrC</i> | -         | -        | -        | -        |
| Ser-Asp rich fibrinogen-binding proteins | <i>sdrD</i> | -         | -        | -        | -        |
| Ser-Asp rich fibrinogen-binding proteins | <i>sdrE</i> | -         | -        | -        | -        |
| Ser-Asp rich fibrinogen-binding proteins | <i>sdrF</i> | SERP0026* | orf00966 | -        | -        |
| Ser-Asp rich fibrinogen-binding proteins | <i>sdrG</i> | SERP0207  | orf00560 | orf00806 | orf01176 |
| Ser-Asp rich fibrinogen-binding proteins | <i>sdrH</i> | SERP1487  | orf01368 | orf01385 | -        |
| Staphylococcal protein A                 | <i>spa</i>  | -         | -        | -        | -        |
| <b>Enzyme (15 Items)</b>                 |             |           |          |          |          |
| Cysteine protease                        | <i>sspB</i> | SERP2390  | orf01117 | orf01141 | orf00918 |
| Cysteine protease                        | <i>sspC</i> | -         | -        | -        | -        |
| Hyaluronate lyase                        | <i>hysA</i> | -         | -        | -        | -        |

|                                    |             |          |          |          |          |
|------------------------------------|-------------|----------|----------|----------|----------|
| Lipase                             | <i>geh</i>  | SERP2388 | orf01116 | orf01142 | orf00917 |
| Lipase                             | <i>lip</i>  | SERP2297 | orf01031 | orf01231 | orf00828 |
| Serine V8 protease                 | <i>sspA</i> | SERP1397 | orf02006 | orf00698 | orf00001 |
| Serine protease                    | <i>splA</i> | -        | -        | -        | -        |
| Serine protease                    | <i>splB</i> | -        | -        | -        | -        |
| Serine protease                    | <i>splC</i> | -        | -        | -        | -        |
| Serine protease                    | <i>splD</i> | -        | -        | -        | -        |
| Serine protease                    | <i>splE</i> | -        | -        | -        | -        |
| Serine protease                    | <i>splF</i> | -        | -        | -        | -        |
| Staphylocoagulase                  | <i>coa</i>  | -        | -        | -        | -        |
| Staphylokinase                     | <i>sak</i>  | -        | -        | -        | -        |
| Thermonuclease                     | <i>nuc</i>  | SERP0891 | orf00240 | orf00058 | orf00475 |
| <b>Immune evasion (5 Items)</b>    |             |          |          |          |          |
| AdsA                               | <i>adsA</i> | -        | -        | -        |          |
| CHIPS                              | <i>chp</i>  | -        | -        | -        |          |
| Capsule                            | --          | -        | -        | -        |          |
| SCIN                               | <i>scn</i>  | -        | -        | -        |          |
| Sbi                                | <i>sbi</i>  | -        | -        | -        |          |
| <b>Secretion system (12 Items)</b> |             |          |          |          |          |
| Type VII secretion system          | <i>esaA</i> | -        | -        | orf00896 | orf00781 |

|                           |                |          |          |          |          |
|---------------------------|----------------|----------|----------|----------|----------|
| Type VII secretion system | <i>esaB</i>    | -        | -        | -        | orf00779 |
| Type VII secretion system | <i>esaD</i>    | -        | -        | orf00905 | -        |
| Type VII secretion system | <i>esaE</i>    | -        | -        | orf00903 | -        |
| Type VII secretion system | <i>esaG</i>    | -        | -        | orf00907 | orf00762 |
| Type VII secretion system | <i>essA</i>    | -        | -        | orf01811 | orf00763 |
| Type VII secretion system | <i>essB</i>    | -        | -        | orf00897 | orf00765 |
| Type VII secretion system | <i>essC</i>    | -        | -        | orf00899 | orf00780 |
| Type VII secretion system | <i>esxA</i>    | -        | -        | orf00900 | orf00778 |
| Type VII secretion system | <i>esxB</i>    | -        | -        | orf00895 | orf00777 |
| Type VII secretion system | <i>esxC</i>    | -        | -        | orf00902 | orf00782 |
| Type VII secretion system | <i>esxD</i>    | -        | -        | orf00901 | -        |
| <b>Toxin (74 Items)</b>   |                |          |          |          |          |
| Alpha hemolysin           | <i>hly/hla</i> | -        | -        | -        | -        |
| Beta hemolysin            | <i>hly</i>     | SERP2544 | orf01000 | orf01906 | orf01048 |
| Delta hemolysin           | <i>hld</i>     | SERP1489 | -        | -        | -        |
| Enterotoxin A             | <i>sea</i>     | -        | -        | -        | -        |
| Enterotoxin B             | <i>seb</i>     | -        | -        | -        | -        |
| Enterotoxin C             | <i>sec</i>     | -        | -        | -        | -        |
| Enterotoxin D             | <i>sed</i>     | -        | -        | -        | -        |

|                          |              |   |   |   |   |
|--------------------------|--------------|---|---|---|---|
| Enterotoxin E            | <i>see</i>   | - | - | - | - |
| Enterotoxin G            | <i>seg</i>   | - | - | - | - |
| Enterotoxin H            | <i>seh</i>   | - | - | - | - |
| Enterotoxin I            | <i>sei</i>   | - | - | - | - |
| Enterotoxin J            | <i>sej</i>   | - | - | - | - |
| Enterotoxin Yent1        | <i>yent1</i> | - | - | - | - |
| Enterotoxin Yent2        | <i>yent2</i> | - | - | - | - |
| Enterotoxin-like K       | <i>selk</i>  | - | - | - | - |
| Enterotoxin-like L       | <i>sell</i>  | - | - | - | - |
| Enterotoxin-like M       | <i>selm</i>  | - | - | - | - |
| Enterotoxin-like N       | <i>seln</i>  | - | - | - | - |
| Enterotoxin-like O       | <i>selo</i>  | - | - | - | - |
| Enterotoxin-like P       | <i>selp</i>  | - | - | - | - |
| Enterotoxin-like Q       | <i>selq</i>  | - | - | - | - |
| Enterotoxin-like R       | <i>selr</i>  | - | - | - | - |
| Enterotoxin-like U       | <i>selu</i>  | - | - | - | - |
| Exfoliative toxin type A | <i>eta</i>   | - | - | - | - |
| Exfoliative toxin type B | <i>etb</i>   | - | - | - | - |
| Exfoliative toxin type C | <i>etc</i>   | - | - | - | - |

|                          |              |   |   |   |   |
|--------------------------|--------------|---|---|---|---|
| Exfoliative toxin type D | <i>etd</i>   | - | - | - | - |
| Exotoxin                 | <i>set10</i> | - | - | - | - |
| Exotoxin                 | <i>set11</i> | - | - | - | - |
| Exotoxin                 | <i>set12</i> | - | - | - | - |
| Exotoxin                 | <i>set13</i> | - | - | - | - |
| Exotoxin                 | <i>set14</i> | - | - | - | - |
| Exotoxin                 | <i>set15</i> | - | - | - | - |
| Exotoxin                 | <i>set16</i> | - | - | - | - |
| Exotoxin                 | <i>set17</i> | - | - | - | - |
| Exotoxin                 | <i>set18</i> | - | - | - | - |
| Exotoxin                 | <i>set19</i> | - | - | - | - |
| Exotoxin                 | <i>set1</i>  | - | - | - | - |
| Exotoxin                 | <i>set20</i> | - | - | - | - |
| Exotoxin                 | <i>set21</i> | - | - | - | - |
| Exotoxin                 | <i>set22</i> | - | - | - | - |
| Exotoxin                 | <i>set23</i> | - | - | - | - |
| Exotoxin                 | <i>set24</i> | - | - | - | - |
| Exotoxin                 | <i>set25</i> | - | - | - | - |
| Exotoxin                 | <i>set26</i> | - | - | - | - |

|          |              |   |   |   |   |
|----------|--------------|---|---|---|---|
| Exotoxin | <i>set2</i>  | - | - | - | - |
| Exotoxin | <i>set30</i> | - | - | - | - |
| Exotoxin | <i>set31</i> | - | - | - | - |
| Exotoxin | <i>set32</i> | - | - | - | - |
| Exotoxin | <i>set33</i> | - | - | - | - |
| Exotoxin | <i>set34</i> | - | - | - | - |
| Exotoxin | <i>set35</i> | - | - | - | - |
| Exotoxin | <i>set36</i> | - | - | - | - |
| Exotoxin | <i>set37</i> | - | - | - | - |
| Exotoxin | <i>set38</i> | - | - | - | - |
| Exotoxin | <i>set39</i> | - | - | - | - |
| Exotoxin | <i>set3</i>  | - | - | - | - |
| Exotoxin | <i>set40</i> | - | - | - | - |
| Exotoxin | <i>set4</i>  | - | - | - | - |
| Exotoxin | <i>set5</i>  | - | - | - | - |
| Exotoxin | <i>set6</i>  | - | - | - | - |
| Exotoxin | <i>set7</i>  | - | - | - | - |
| Exotoxin | <i>set8</i>  | - | - | - | - |
| Exotoxin | <i>set9</i>  | - | - | - | - |

|                             |                  |   |   |   |   |
|-----------------------------|------------------|---|---|---|---|
| Gamma hemolysin             | <i>hlgA</i>      | - | - | - | - |
| Gamma hemolysin             | <i>hlgB</i>      | - | - | - | - |
| Gamma hemolysin             | <i>hlgC</i>      | - | - | - | - |
| Leukocidin M                | <i>lukF-like</i> | - | - | - | - |
| Leukocidin M                | <i>lukM</i>      | - | - | - | - |
| Leukotoxin D                | <i>lukD</i>      | - | - | - | - |
| Leukotoxin E                | <i>lukE</i>      | - | - | - | - |
| Panton-Valentine leukocidin | <i>lukF-PV</i>   | - | - | - | - |
| Panton-Valentine leukocidin | <i>lukS-PV</i>   | - | - | - | - |
| Toxic shock syndrome toxin  | <i>tsst</i>      | - | - | - | - |



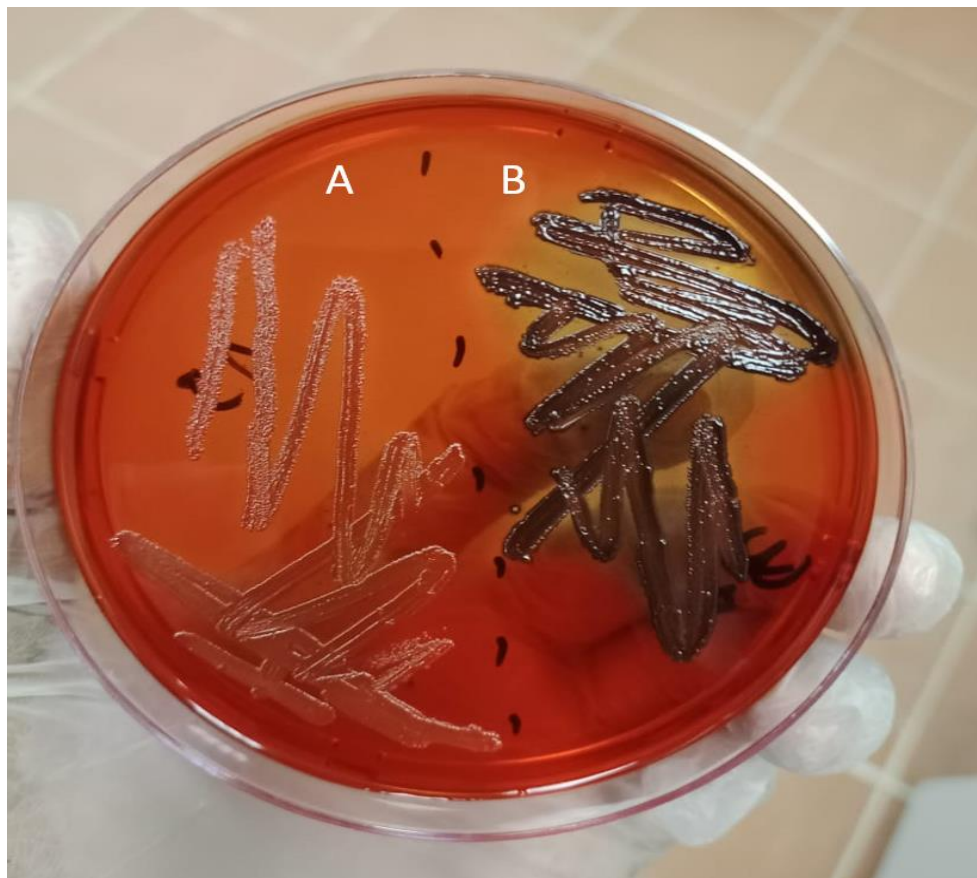

Figure S1. Congo red agar, showing biofilm production, A. Biofilm negative isolate B. Biofilm positive isolate (9SE) showing the black metallic sheen colonies

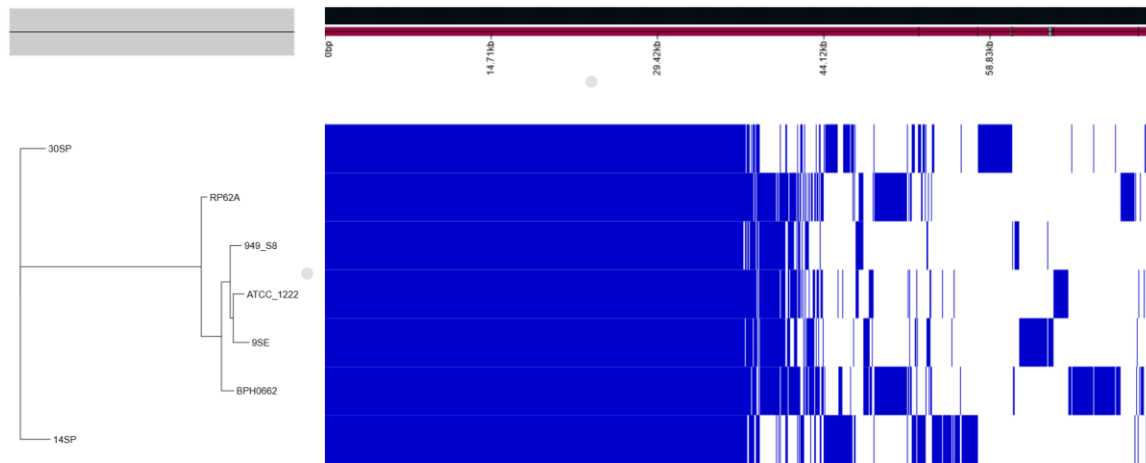

Figure S2: *S. epidermidis* variable genome. Only the variable genome is shown. Gene clusters present in all genomes or present in only a single genome are viewed. Gene presence is indicated by a blue bar.



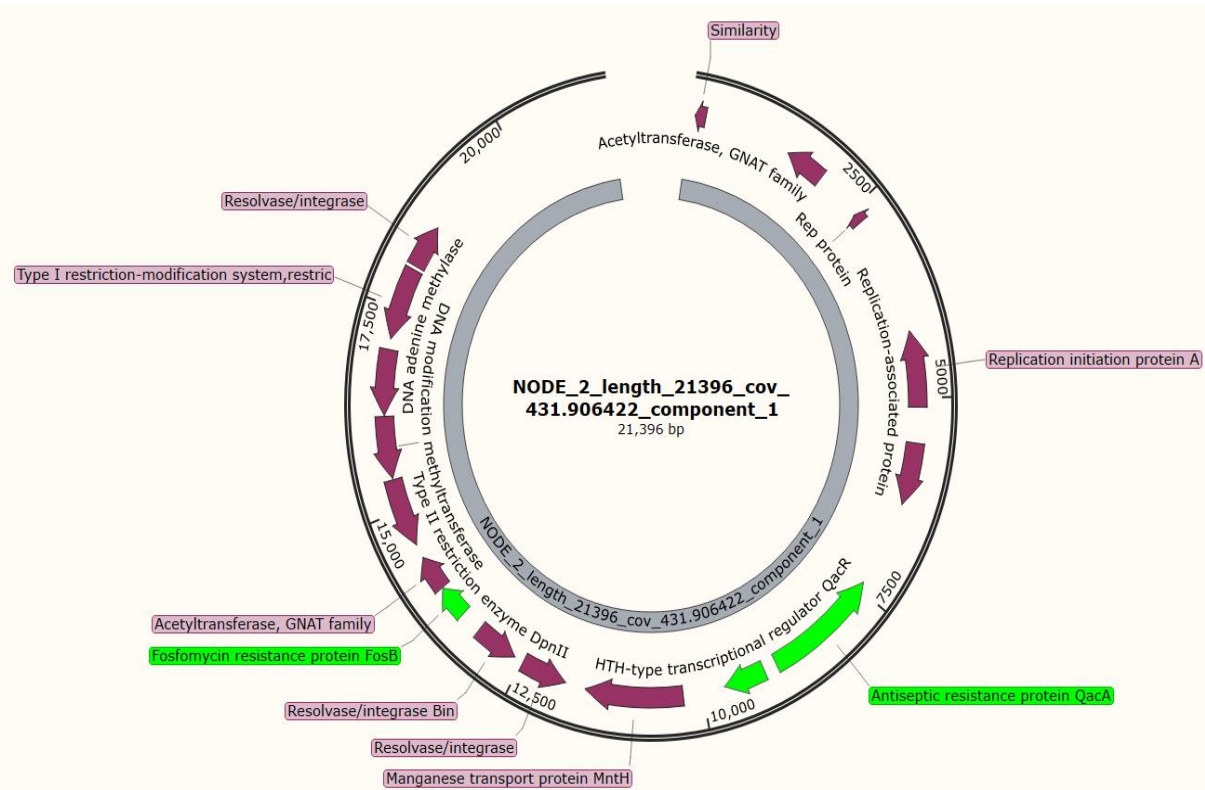

Figure S4. Circular representation of clustered ARGs (green) in isolate 9SE, the *repA* gene is shown in the end of the contig (5000bp).
